# Supplementary material for: A comparative study of the self-assembly of achiral and chiral hairy nanoparticles with polystyrene cores and poly(2-hydroxyethylmethacrylate) hairs
Source: Royal Society of Chemistry journal article supplement (doi:10.1039/d0ra04951d), 2020-01-01
Supplement: d0ra04951d1.pdf [file d0ra04951d1.pdf]

Habel and Khan, Electronic Supplementary Information

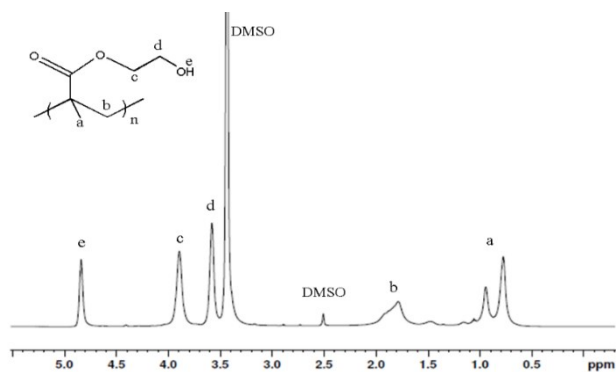

Fig. S1. <sup>1</sup>H NMR spectrum of PHEMA in DMSO-d<sub>6</sub>.

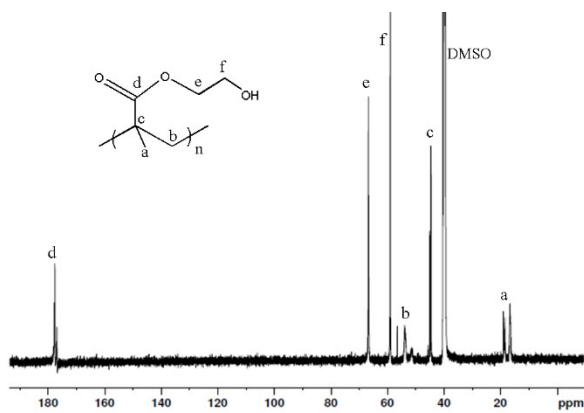

Fig. S2. <sup>13</sup>C NMR spectrum of PHEMA in DMSO-d<sub>6</sub>.

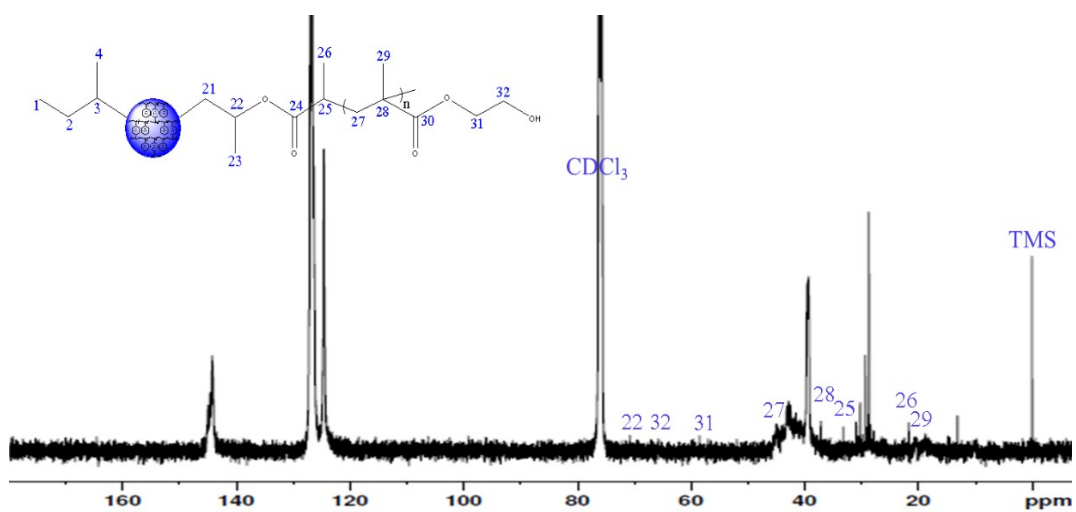

Fig. S3  $^{13}\text{C}$  NMR spectrum of PS Core-PHEMA in  $\text{CDCl}_3$ .

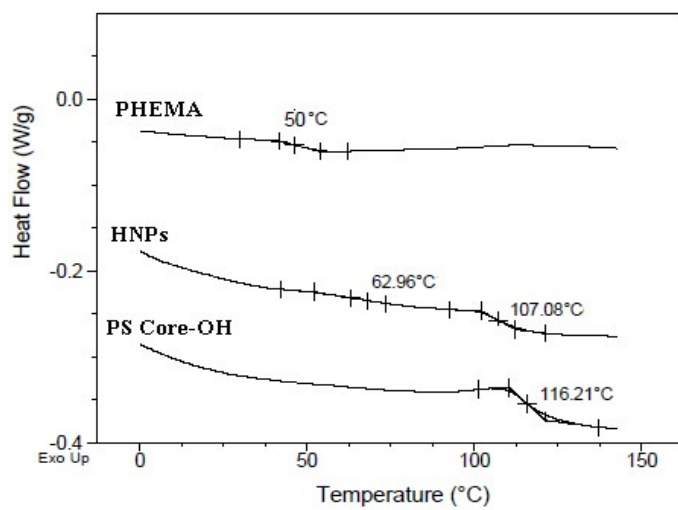

Fig. S4. DSC thermograms of HNP (PS Core-PHEMA), PS Core-OH, and PHEMA.

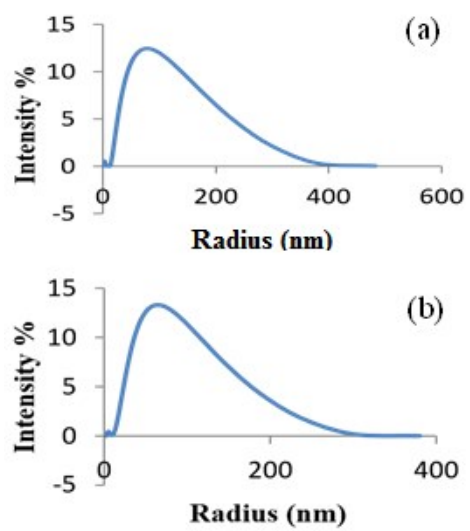

Fig. S5. The particles size distribution profiles in  $\text{CHCl}_3$  of (a) PS Core-PHEMA, and (b) PS Core-OH.
